# Supplementary material for: In Silico Screening of Drugs That Target Different Forms of E Protein for Potential Treatment of COVID-19
Source: MDPI journal article supplement (doi:10.3390/ph16020296), 2023-02-14
Supplement: s1 [file s1]

**Table S4. Docking molecular from compounds on the E-monomer (C-Terminal Harpin):** The best affinities calculated from molecular docking analysis on the E monomer (C-terminal Hairpin).

| Docking molecular from compounds on the E-monomer (C-Terminal Harpin). |                     |                                                                                                  |
|------------------------------------------------------------------------|---------------------|--------------------------------------------------------------------------------------------------|
| Drug                                                                   | Affinity (kcal/mol) | Amino acids                                                                                      |
| Irinotecan                                                             | -8.2                | Phe20, Phe23, Leu27, Leu73, Leu74, Val47, Val58, Ile46, Val49, Leu51, Tyr57, Ser55, Tyr59        |
| Nilotinib                                                              | -8.2                | Ser55, Tyr57, Tyr59, Leu74, Val75, Leu51, Val58, Val62, Arg69, Pro71, Val70                      |
| Avodart                                                                | -8.1                | Val47, Leu27, Ile46, Leu51, Val70, Try57, Val58, Val49, Val75, Leu74, Pro71                      |
| Fexofenadine                                                           | -8.0                | Val58, Val62, Val70, Try59, Val75, Tyr57, Ser55, Leu51, Leu65, Arg61, Ser67, Arg69, Pro71, Asp72 |
| Ternadin                                                               | -8.0                | Tyr57, Ser55, Val58, Leu51, Tyr59, Val75, Val62, Leu65, Ser67, Arg61, Ser68, Arg69, Val70, Asp72 |
| Lumacaftor                                                             | -7.9                | Ser55, Leu51, Val62, Ser68, Arg69, Tyr57, Pro71, Val75, Leu74, Val70, Val58                      |
| Amaryl                                                                 | -7.8                | Ser55, Tyr57, Val58, Val70, Pro71, Leu74, Val75, Val49, Leu27, Val47, Ile46, Ser50, Leu51        |
| Saquinavir                                                             | -7.7                | Val70, Arg61, Pro71, Tyr57, Leu74, Leu51, Phe56, Val52, Ser55, Tyr59, Val75, Val58               |
| Naldemidine                                                            | -7.7                | Lys63, Leu65, Arg69, Ser67, Ser68, Val70, Arg61, Leu74, Val62, Try59, Val58, Val75               |
