# Supplementary material for: In Silico Screening of Drugs That Target Different Forms of E Protein for Potential Treatment of COVID-19
Source: MDPI journal article supplement (doi:10.3390/ph16020296), 2023-02-14
Supplement: s1 [file s1]

**Table S2. Molecular docking studies drugs on the E-homopentamer (N-terminal):** The best affinities calculated from molecular docking analysis (on the E-homopentamer (N terminal)) are reported in this table

| Molecular docking studies drugs on the E-homopentamer (N-terminal). |                     |                                                                                                                                                                   |
|---------------------------------------------------------------------|---------------------|-------------------------------------------------------------------------------------------------------------------------------------------------------------------|
| Drug                                                                | Affinity (kcal/mol) | Amino acids                                                                                                                                                       |
| Alectinib                                                           | -9.6                | Asn15E, Val14E, Asn15D, Thr11D, Asn15, Glu7B, Thr11A, Thr11B, Glu7B, Gly10B, Leu12A, Ser6B, Val5B, Glu7A, Glu8A, Ser3B                                            |
| Saquinavir                                                          | -9.3                | Ser3D, Tyr2D, Val5D, Glu7C, Met1D, Gly10C, Ser6C, Ser6B, Glu8B, Gly10B, Val5B, Glu8A, Glu7B, Thr11A, Thr11B, Asn15A, Thr11E, Gly10E, Val14E, Thr11D, Glu8D, Glu7D |
| Amaryl                                                              | -9.2                | Glu7A, Glu8A, Val5B, Leu12A, Gly10B, Thr11A, Ser6B, Glu7B, Thr11C, Val14C, Tyr2C, Val5C, Ile13C, Gly10C, Glu8B, Met1C, Ser6C                                      |
| Ponatinib                                                           | -9.2                | Glu7D, Ser6D, Val5D, Gly10C, Val14D, Asn15D, Thr11D, Thr11C, Asn15A, Thr11A, Ser6B, Gly10B, Leu12A, Val5B, Glu8A, Glu7A, Ser3B, Glu7B, Thr11B                     |
| Lifitegrast                                                         | -9.2                | Met1C, Ser3B, Ser6B, Glu8A, Glu7B, Gly10B, Thr11A, Met1A, Thr11E, Glu7D, Val5E, Glu8D, Gly10E, Val14E, Met1E, Thr11D, Asn15A, Thr11B, Glu7A                       |
| Accolate                                                            | -9.1                | Thr11E, Glu7D, Met1A, Thr11A, Glu7B, Thr11D, Asn15D, Met1D, Glu7C, Val5D, Glu8C, Gly10C, Thr11C, Ser6D, Val14D, Asn15A, Gly10E, Glu10E, Glu8D                     |
| Lumacaftor                                                          | -9.1                | Leu12B, Glu7B, Glu8B, Met1D, Glu7D, Val5D, Ser6D, Gly10D, Thr11D, Val14D, Gly10D, Thr11C, Val14C, Ser6C, Ile13C, Val5C, Tyr2C                                     |
| Vinblastine sulfate                                                 | -9.1                | Glu7E, Met1E, Glu8D, Glu7D, Gly10C, Thr11C, Ser6D, Val5D, Val14D, Gly10D, Thr11D, Thr11B, Glu7B, Met1D, Met1C, Ser6C, Glu8B, Thr11E, Thr11A, Glu7A, Met1A, Glu8E  |
