# Supplementary material for: In Silico Screening of Drugs That Target Different Forms of E Protein for Potential Treatment of COVID-19
Source: MDPI journal article supplement (doi:10.3390/ph16020296), 2023-02-14
Supplement: s1 [file s1]

**Table S3. Docking molecular from compounds on the E-monomer (C-terminal solvent exposed):** The best affinities calculated from molecular docking analysis on the E-monomer (C-terminal, solvent exposed).

| Docking molecular from compounds on the E-monomer (C-terminal solvent exposed). |                     |                                                                                                         |
|---------------------------------------------------------------------------------|---------------------|---------------------------------------------------------------------------------------------------------|
| Drug                                                                            | Affinity (kcal/mol) | Amino acids                                                                                             |
| Irinotecan                                                                      | -8.0                | Leu51, Lys53, Phe56, Tyr57, Ser60, Asn64, Lys63, Arg69, Val75, Asp72, Ser67, Ser68, Val70               |
| Saquinavir                                                                      | -7.9                | Val70, Asp72, Ser67, Arg69, Ser68, Val75, Leu74, Tyr57, Lys53, Phe56, Leu51, Ser60, Lys63, Asn64, Tyr59 |
| Avodart                                                                         | -7.7                | Leu74, Pro71, Val70, Asp72, Ser68, Ser67, Arg69, Lys63, Val75, Asn64, Ser60, Tyr59, Phe56               |
| Novobiocin sodium                                                               | -7.7                | Val52, Ser55, Tyr59, Ser60, Lys63, Asn64, Phe56, Ser67, Ser68, Val70, Asp72, Arg69, Leu74, Val75        |
| Lapatinib                                                                       | -7.6                | Lys63, Leu74, Asp72, Val75, Ser67, Ser68, Val70, Arg69, Phe56, Tyr57, leu51, Lys53, Ser60, Asn64, Tyr59 |
| Tetracycline hydrochloride                                                      | -7.5                | Val70, Ser67, Asp72, Arg69, Val75, Ser68, Asn64, Leu74                                                  |
| Cepharanthine                                                                   | -7.5                | Ser60, Asn64, Leu74, Lys63, Val75, Ser67, Arg69, Asp72, Val70, Leu74                                    |
| Pranlukast                                                                      | -7.5                | Ser55, Tyr59, Phe56, Lys63, Ser67, Arg69, Asp72, Ser68, Val70, Val75, Asn64, Ser60                      |
| Naldemidine                                                                     | -7.4                | Lys63, Leu74, Asp72, Asn64, Ser67, Ser68, Ser60, Arg69, Tyr59, Val75                                    |
| Ixabepilone                                                                     | -7.3                | Asn64, Arg69, Ser67, Ser68, Lys63, Asp72, Leu73, Pro71, Val70, Leu74, Val75                             |
| Imatinib                                                                        | -7.3                | Tyr59, Ser60, Asn64, Arg69, Ser68, Ser67, Lys63, Pro71, Asp72, Val70, Leu73                             |
