# Supplementary material for: In Silico Screening of Drugs That Target Different Forms of E Protein for Potential Treatment of COVID-19
Source: MDPI journal article supplement (doi:10.3390/ph16020296), 2023-02-14
Supplement: s1 [file s1]

**Table S1. Molecular docking studies drugs on the E-homopentamer (Ion Channel):**  
The best affinities calculated from molecular docking analysis (on the Ion Channel form) are reported in this table.

| Molecular docking studies drugs on the E-homopentamer (Ion Channel). |                     |                                                                                                                                                                                                        |
|----------------------------------------------------------------------|---------------------|--------------------------------------------------------------------------------------------------------------------------------------------------------------------------------------------------------|
| Drug                                                                 | Affinity (kcal/mol) | Amino acids involved                                                                                                                                                                                   |
| Lumacaftor                                                           | -10.9               | Phe26E, Phe26A, Phe23E, Val29A, Val25A, Ala22E, Leu19E, Ala22C, Ala22B, Ala22D, Phe23C, Phe26D, Phe26C, Phe26B, Val25D, Leu19C, Ala22A                                                                 |
| Xaliproden                                                           | -10.9               | Phe26D, Phe26A, Leu27E, Thr30E, Val29A, Phe23B, Val29C, Phe26C, Phe26B, Phe26E, Phe23E                                                                                                                 |
| Nilotinib                                                            | -10.8               | Leu28D, Leu27C, Val25D, Leu19A, Phe23A, Phe26B, Phe26A, Phe26D, Thr30C, Phe26E, Val29C, Ala22B, Ala22D, Phe26C, Ala22C, Leu19C, Ala22A, Val29D, Phe23C                                                 |
| Avodart                                                              | -10.6               | Leu19D, Leu18D, Leu19C, Leu18C, Ser16B, Leu21C, Phe26A, Leu19B, Leu18B, Phe26E, Phe23E, Val25A, Leu19E, Ala22A, Ala22C                                                                                 |
| Naldemedine                                                          | -10.5               | Ala22A, Leu19E, Phe26A, Leu18D, Leu19C, Phe26E, Phe23E, Ala22E, Val25A, Val29A, Phe26D, Val25D, Phe23C, Ala22C, Phe26C, Leu19D, Ala22D, Phe26A                                                         |
| Ebastine                                                             | -10.3               | Phe23C, Thr30C, Val29C, Thr30E, Leu27E, Val29A, Phe26D, Phe26C, Phe26E, Phe26A, Phe23E, Val29D, Val25D, Val25A.                                                                                        |
| Pranlukast                                                           | -10.3               | Leu18C, Val25A, Leu19E, Thr30E, Leu27E, Asn15B, Leu18B, Leu19B, Val29A, Ala22C, Leu21C, Leu18A, Ala22A, Ala22E, Phe26A, Phe23E, Phe26E.                                                                |
| Zafirlukast                                                          | -10.2               | Val29C, Phe26C, Phe26D, Val29D, Val29A, Val25D, Phe26A, Phe26B, Phe26E, Phe23E, Thr30C, Thr30B, Ile33C, Phe23C, Val29E, Thr30E                                                                         |
| Irinotecan                                                           | -10.1               | Ala22D, Phe26E, Leu19C, Leu18C, Leu19B, Leu28D, Thr30C, Leu18B, Leu19B, Leu18C, Phe23C, Val25D, Leu27C, Val29D, Ala22C, Phe26C, Phe26D                                                                 |
| Flunarizine                                                          | -10.1               | Leu19C, Leu19B, Phe23B, Phe26B, Phe23B, Phe26D, Leu19E, Ala22E, Ala22B, Ala22C, Ala22D, Val29D, Val25A, Phe26C, Phe23E, Phe26E, Phe26A,                                                                |
| Rolapitant                                                           | -10.1               | Phe26E, Ala22D, Phe26D, Phe26C, Ala22E, Val25A, Leu19D, Ala22C, Phe23C, Leu19C, Val25D, Ala22A, Leu18B, Leu19B, Ala22B, Leu19A, Leu19E, Phe26A y Phe23E                                                |
| Conivaptan                                                           | -10.1               | Asn15E, Phe26A, Phe26E, Leu18D, Leu19c, Leu19B, Phe26C, Phe26D, Ala22A, Leu21A, Leu19E, Leu18A, Ala22E, Ala22D, Leu19D, Leu18E, Ala22C                                                                 |
| Mepron                                                               | -10                 | Leu18A, Leu19E, Thr30E, Leu18D, Leu19D, Phe23E, Leu18E, Phe26E, Ala22A, Ala22E, Phe26A, Val25A y Val29A                                                                                                |
| Apc                                                                  | -10                 | Phe23E, Ala22E, Phe26E, Val25A, Val29A, Thr30C, Leu28D, Phe26A, Phe26D, Phe26C, Leu27C, Val25D, Val29D, Phe23C.                                                                                        |
| Saquinavir                                                           | -9.9                | Phe26B, Ala22B, Leu19A, Phe26C, Phe26D, Phe23C, Ala22D, Leu18D, Leu19C, Phe26A, Leu18E, Leu19D, Leu18B, Leu19E, Val25A, Phe23E, Leu18C, Asn15B, Leu21C, Ala22C, Ala22A, Leu18A, Ala22E, Leu19B, Phe26E |
